# Supplementary material
Source: publisher figshare collection journal article supplement (https://acs.figshare.com/ndownloader/files/5193526)
Supplement: Supplementary file 1 [file 5193526]

data_1a

_diffrn_measurement_domega        0.30
_diffrn_measurement_rtime         43

_chemical_formula_sum
 'C33 H27 N3 O3'
_chemical_formula_weight          513.58

loop_
 _atom_type_symbol
 _atom_type_description
 _atom_type_scat_dispersion_real
 _atom_type_scat_dispersion_imag
 _atom_type_scat_source
 'C'  'C'   0.0033   0.0016
 'International Tables Vol C Tables 4.2.6.8 and 6.1.1.4'
 'H'  'H'   0.0000   0.0000
 'International Tables Vol C Tables 4.2.6.8 and 6.1.1.4'
 'N'  'N'   0.0061   0.0033
 'International Tables Vol C Tables 4.2.6.8 and 6.1.1.4'
 'O'  'O'   0.0106   0.0060
 'International Tables Vol C Tables 4.2.6.8 and 6.1.1.4'

_symmetry_cell_setting            Monoclinic
_symmetry_space_group_name_H-M    'P 21/n (14)'

loop_
 _symmetry_equiv_pos_as_xyz
 'x, y, z'
 '-x+1/2, y+1/2, -z+1/2'
 '-x, -y, -z'
 'x-1/2, -y-1/2, z-1/2'

_cell_length_a                    16.632(4)
_cell_length_b                    10.470(2)
_cell_length_c                    17.549(4)
_cell_angle_alpha                 90.00
_cell_angle_beta                  114.530(10)
_cell_angle_gamma                 90.00
_cell_volume                      2780.1(11)
_cell_formula_units_Z             4
_cell_measurement_temperature     293(2)
_cell_measurement_reflns_used     432
_cell_measurement_theta_min       3.
_cell_measurement_theta_max       20.

_exptl_crystal_description        column
_exptl_crystal_colour             colourless
_exptl_crystal_size_max           0.250
_exptl_crystal_size_mid           0.100
_exptl_crystal_size_min           0.080
_exptl_crystal_density_diffrn     1.227
_exptl_crystal_density_method     'not measured'
_exptl_crystal_F_000              1080
_exptl_absorpt_coefficient_mu     0.080
_exptl_absorpt_correction_type    sadabs
_exptl_absorpt_correction_T_min   0.75
_exptl_absorpt_correction_T_max   1.00

_diffrn_ambient_temperature       293(2)
_diffrn_radiation_wavelength      0.71073
_diffrn_radiation_type            MoK\a
_diffrn_radiation_source          'fine-focus sealed tube'
_diffrn_radiation_monochromator   graphite
_diffrn_measurement_device        SMART
_diffrn_detector_type             CCD_plate
_diffrn_measurement_method        omega-scan
_diffrn_standards_decay_%         6
_diffrn_reflns_number             20917
_diffrn_reflns_av_R_equivalents   0.1610
_diffrn_reflns_av_sigmaI/netI     0.1378
_diffrn_reflns_limit_h_min        -16
_diffrn_reflns_limit_h_max        17
_diffrn_reflns_limit_k_min        -11
_diffrn_reflns_limit_k_max        10
_diffrn_reflns_limit_l_min        -18
_diffrn_reflns_limit_l_max        18
_diffrn_reflns_theta_min          1.42
_diffrn_reflns_theta_max          21.98
_reflns_number_total              3379
_reflns_number_observed           1591
_reflns_observed_criterion        >2sigma(I)

_computing_structure_solution     SIR92
_computing_structure_refinement   'SHELXL-97 (Sheldrick, 1997)'
_computing_molecular_graphics     SCHAKAL

_refine_special_details
;
 Refinement of F^2^ against ALL reflections.  The weighted R-factor wR and
 goodness of fit S are based on F^2^, conventional R-factors R are based
 on F, with F set to zero for negative F^2^. The threshold expression of
 F^2^ > 2sigma(F^2^) is used only for calculating R-factors(gt) etc. and is
 not relevant to the choice of reflections for refinement.  R-factors based
 on F^2^ are statistically about twice as large as those based on F, and R-
 factors based on ALL data will be even larger.
;

_refine_ls_structure_factor_coef  Fsqd
_refine_ls_matrix_type            full
_refine_ls_weighting_scheme       calc
_refine_ls_weighting_details
 'calc w=1/[\s^2^(Fo^2^)+(0.1564P)^2^+3.1892P] where P=(Fo^2^+2Fc^2^)/3'
_atom_sites_solution_primary      direct
_atom_sites_solution_secondary    difmap
_atom_sites_solution_hydrogens    geom
_refine_ls_hydrogen_treatment     mixed
_refine_ls_extinction_method      none
_refine_ls_number_reflns          3379
_refine_ls_number_parameters      220
_refine_ls_number_restraints      0
_refine_ls_R_factor_all           0.1973
_refine_ls_R_factor_obs           0.0906
_refine_ls_wR_factor_all          0.3204
_refine_ls_wR_factor_obs          0.2350
_refine_ls_goodness_of_fit_all    1.016
_refine_ls_restrained_S_all       1.016
_refine_ls_shift/su_max           0.000
_refine_ls_shift/su_mean          0.000

loop_
 _atom_site_label
 _atom_site_type_symbol
 _atom_site_fract_x
 _atom_site_fract_y
 _atom_site_fract_z
 _atom_site_U_iso_or_equiv
 _atom_site_adp_type
 _atom_site_occupancy
 _atom_site_symmetry_multiplicity
 _atom_site_calc_flag
 _atom_site_refinement_flags
 _atom_site_disorder_assembly
 _atom_site_disorder_group
C1 C 0.5240(4) -0.1132(4) 0.7981(3) 0.0546(19) Uani 1 1 d G . .
C2 C 0.6124(3) -0.1043(4) 0.8121(3) 0.059(2) Uani 1 1 d G . .
C3 C 0.6398(3) -0.0089(5) 0.7731(3) 0.058(2) Uani 1 1 d G . .
C4 C 0.5787(4) 0.0776(4) 0.7201(3) 0.064(2) Uani 1 1 d G . .
C5 C 0.4903(3) 0.0687(4) 0.7061(3) 0.058(2) Uani 1 1 d G . .
C6 C 0.4629(2) -0.0266(5) 0.7451(3) 0.059(2) Uani 1 1 d G . .
C7 C 0.8468(3) 0.1638(5) 0.8727(3) 0.0652(13) Uani 1 1 d G . .
C8 C 0.9146(3) 0.1044(4) 0.8593(3) 0.0752(11) Uani 1 1 d G . .
H8 H 0.9052 0.0251 0.8331 0.090 Uiso 1 1 calc R . .
C9 C 0.9965(3) 0.1635(5) 0.8850(3) 0.0769(11) Uani 1 1 d G . .
H9 H 1.0419 0.1238 0.8761 0.092 Uiso 1 1 calc R . .
C10 C 1.0106(3) 0.2820(5) 0.9242(3) 0.0670(13) Uani 1 1 d G . .
C11 C 0.9429(4) 0.3414(4) 0.9376(3) 0.0769(11) Uani 1 1 d G . .
H11 H 0.9523 0.4207 0.9638 0.092 Uiso 1 1 calc R . .
C12 C 0.8610(3) 0.2823(5) 0.9119(3) 0.0752(11) Uani 1 1 d G . .
H12 H 0.8156 0.3220 0.9208 0.090 Uiso 1 1 calc R . .
C13 C 0.3639(3) 0.3606(4) 0.6758(3) 0.0652(13) Uani 1 1 d G . .
C14 C 0.3151(3) 0.3844(4) 0.5910(3) 0.0752(11) Uani 1 1 d G . .
H14 H 0.3181 0.3282 0.5513 0.090 Uiso 1 1 calc R . .
C15 C 0.2617(3) 0.4922(5) 0.5657(2) 0.0769(11) Uani 1 1 d G . .
H15 H 0.2290 0.5081 0.5090 0.092 Uiso 1 1 calc R . .
C16 C 0.2572(3) 0.5762(4) 0.6251(3) 0.0670(13) Uani 1 1 d G . .
C17 C 0.3060(3) 0.5525(4) 0.7099(3) 0.0769(11) Uani 1 1 d G . .
H17 H 0.3030 0.6087 0.7496 0.092 Uiso 1 1 calc R . .
C18 C 0.3594(3) 0.4447(5) 0.7352(2) 0.0752(11) Uani 1 1 d G . .
H18 H 0.3921 0.4288 0.7920 0.090 Uiso 1 1 calc R . .
C19 C 0.4553(3) -0.2233(4) 0.9586(3) 0.0652(13) Uani 1 1 d G . .
C20 C 0.4267(3) -0.3493(4) 0.9433(3) 0.0752(11) Uani 1 1 d G . .
H20 H 0.4277 -0.3924 0.8974 0.090 Uiso 1 1 calc R . .
C21 C 0.3967(3) -0.4108(3) 0.9967(3) 0.0769(11) Uani 1 1 d G . .
H21 H 0.3776 -0.4951 0.9865 0.092 Uiso 1 1 calc R . .
C22 C 0.3952(3) -0.3464(5) 1.0654(3) 0.0670(13) Uani 1 1 d G . .
C23 C 0.4238(3) -0.2204(4) 1.0807(3) 0.0769(11) Uani 1 1 d G . .
H23 H 0.4228 -0.1773 1.1266 0.092 Uiso 1 1 calc R . .
C24 C 0.4539(3) -0.1588(3) 1.0273(3) 0.0752(11) Uani 1 1 d G . .
H24 H 0.4730 -0.0745 1.0375 0.090 Uiso 1 1 calc R . .
C25 C 0.3688(6) -0.4109(7) 1.1236(5) 0.075(2) Uani 1 1 d . . .
C26 C 1.0956(6) 0.3431(9) 0.9539(5) 0.081(3) Uani 1 1 d . . .
C27 C 0.2036(6) 0.6885(9) 0.6024(6) 0.086(3) Uani 1 1 d . . .
C28 C 0.4926(5) -0.2157(7) 0.8395(4) 0.068(2) Uani 1 1 d . . .
H28A H 0.4348 -0.2468 0.8016 0.082 Uiso 1 1 calc R . .
H28B H 0.5336 -0.2869 0.8561 0.082 Uiso 1 1 calc R . .
C29 C 0.6784(5) -0.1991(8) 0.8710(5) 0.086(3) Uani 1 1 d . . .
H29A H 0.7363 -0.1806 0.8744 0.130 Uiso 1 1 calc R . .
H29B H 0.6617 -0.2842 0.8500 0.130 Uiso 1 1 calc R . .
H29C H 0.6787 -0.1923 0.9257 0.130 Uiso 1 1 calc R . .
C30 C 0.7366(5) 0.0071(8) 0.7942(5) 0.077(2) Uani 1 1 d . . .
H30A H 0.7690 -0.0701 0.8194 0.093 Uiso 1 1 calc R . .
H30B H 0.7457 0.0266 0.7443 0.093 Uiso 1 1 calc R . .
C31 C 0.6115(6) 0.1854(8) 0.6807(5) 0.093(3) Uani 1 1 d . . .
H31A H 0.6739 0.1762 0.6971 0.139 Uiso 1 1 calc R . .
H31B H 0.5998 0.2664 0.6996 0.139 Uiso 1 1 calc R . .
H31C H 0.5812 0.1808 0.6208 0.139 Uiso 1 1 calc R . .
C32 C 0.4249(6) 0.1657(7) 0.6514(5) 0.076(2) Uani 1 1 d . . .
H32A H 0.4450 0.2022 0.6115 0.092 Uiso 1 1 calc R . .
H32B H 0.3676 0.1265 0.6207 0.092 Uiso 1 1 calc R . .
C33 C 0.3668(5) -0.0288(9) 0.7341(6) 0.094(3) Uani 1 1 d . . .
H33A H 0.3583 -0.0987 0.7654 0.140 Uiso 1 1 calc R . .
H33B H 0.3285 -0.0391 0.6759 0.140 Uiso 1 1 calc R . .
H33C H 0.3532 0.0501 0.7541 0.140 Uiso 1 1 calc R . .
N1 N 0.3482(6) -0.4610(8) 1.1697(5) 0.109(3) Uani 1 1 d . . .
N2 N 1.1616(5) 0.3960(8) 0.9763(5) 0.107(3) Uani 1 1 d . . .
N3 N 0.1631(5) 0.7812(8) 0.5855(5) 0.108(3) Uani 1 1 d . . .
O1 O 0.7654(3) 0.1127(5) 0.8531(3) 0.0844(18) Uani 1 1 d . . .
O2 O 0.4883(3) -0.1558(4) 0.9124(3) 0.0694(15) Uani 1 1 d . . .
O3 O 0.4197(4) 0.2619(5) 0.7071(3) 0.0908(19) Uani 1 1 d . . .

loop_
 _atom_site_aniso_label
 _atom_site_aniso_U_11
 _atom_site_aniso_U_22
 _atom_site_aniso_U_33
 _atom_site_aniso_U_23
 _atom_site_aniso_U_13
 _atom_site_aniso_U_12
C1 0.068(5) 0.052(5) 0.051(5) -0.005(4) 0.031(4) -0.005(4)
C2 0.067(6) 0.062(5) 0.049(5) -0.013(4) 0.025(4) 0.002(4)
C3 0.070(6) 0.065(5) 0.051(5) -0.011(4) 0.036(4) -0.007(5)
C4 0.100(7) 0.055(5) 0.048(5) -0.012(4) 0.042(5) -0.016(5)
C5 0.065(5) 0.063(5) 0.048(4) -0.011(4) 0.025(4) -0.004(4)
C6 0.068(6) 0.066(5) 0.053(5) -0.011(4) 0.037(4) -0.011(5)
C7 0.072(3) 0.068(3) 0.055(3) -0.009(2) 0.025(2) -0.005(3)
C8 0.090(3) 0.068(2) 0.069(2) -0.0132(18) 0.035(2) -0.0059(19)
C9 0.087(2) 0.073(2) 0.073(2) -0.0070(19) 0.035(2) -0.008(2)
C10 0.067(3) 0.068(3) 0.063(3) 0.008(2) 0.024(2) -0.005(3)
C11 0.087(2) 0.073(2) 0.073(2) -0.0070(19) 0.035(2) -0.008(2)
C12 0.090(3) 0.068(2) 0.069(2) -0.0132(18) 0.035(2) -0.0059(19)
C13 0.072(3) 0.068(3) 0.055(3) -0.009(2) 0.025(2) -0.005(3)
C14 0.090(3) 0.068(2) 0.069(2) -0.0132(18) 0.035(2) -0.0059(19)
C15 0.087(2) 0.073(2) 0.073(2) -0.0070(19) 0.035(2) -0.008(2)
C16 0.067(3) 0.068(3) 0.063(3) 0.008(2) 0.024(2) -0.005(3)
C17 0.087(2) 0.073(2) 0.073(2) -0.0070(19) 0.035(2) -0.008(2)
C18 0.090(3) 0.068(2) 0.069(2) -0.0132(18) 0.035(2) -0.0059(19)
C19 0.072(3) 0.068(3) 0.055(3) -0.009(2) 0.025(2) -0.005(3)
C20 0.090(3) 0.068(2) 0.069(2) -0.0132(18) 0.035(2) -0.0059(19)
C21 0.087(2) 0.073(2) 0.073(2) -0.0070(19) 0.035(2) -0.008(2)
C22 0.067(3) 0.068(3) 0.063(3) 0.008(2) 0.024(2) -0.005(3)
C23 0.087(2) 0.073(2) 0.073(2) -0.0070(19) 0.035(2) -0.008(2)
C24 0.090(3) 0.068(2) 0.069(2) -0.0132(18) 0.035(2) -0.0059(19)
C25 0.100(7) 0.063(5) 0.076(6) 0.003(5) 0.053(6) 0.000(5)
C26 0.068(6) 0.095(6) 0.070(6) 0.015(5) 0.018(5) -0.003(5)
C27 0.081(6) 0.077(6) 0.088(7) 0.015(6) 0.022(5) 0.002(5)
C28 0.097(6) 0.063(5) 0.062(5) -0.014(4) 0.051(5) -0.018(4)
C29 0.089(6) 0.089(6) 0.078(6) -0.006(5) 0.031(5) 0.003(5)
C30 0.077(6) 0.091(6) 0.075(6) -0.031(5) 0.044(5) -0.020(5)
C31 0.123(7) 0.089(6) 0.078(6) 0.003(5) 0.053(6) -0.028(6)
C32 0.095(6) 0.073(5) 0.054(5) -0.002(5) 0.024(5) 0.015(5)
C33 0.070(6) 0.118(7) 0.101(7) -0.010(6) 0.044(5) -0.008(5)
N1 0.154(8) 0.104(6) 0.099(6) 0.016(5) 0.081(6) -0.013(5)
N2 0.075(5) 0.132(7) 0.094(6) 0.015(5) 0.014(5) -0.021(5)
N3 0.094(6) 0.091(6) 0.124(7) 0.017(5) 0.032(5) 0.013(5)
O1 0.076(4) 0.103(4) 0.087(4) -0.044(3) 0.046(3) -0.030(3)
O2 0.111(4) 0.057(3) 0.065(3) -0.018(3) 0.061(3) -0.031(3)
O3 0.118(5) 0.078(4) 0.054(3) -0.004(3) 0.013(3) 0.034(3)

_geom_special_details
;
 All esds (except the esd in the dihedral angle between two l.s. planes)
 are estimated using the full covariance matrix.  The cell esds are taken
 into account individually in the estimation of esds in distances, angles
 and torsion angles; correlations between esds in cell parameters are only
 used when they are defined by crystal symmetry.  An approximate (isotropic)
 treatment of cell esds is used for estimating esds involving l.s. planes.
;

loop_
 _geom_bond_atom_site_label_1
 _geom_bond_atom_site_label_2
 _geom_bond_distance
 _geom_bond_site_symmetry_2
 _geom_bond_publ_flag
C1 C2 1.3900 . ?
C1 C6 1.3900 . ?
C1 C28 1.506(8) . ?
C2 C3 1.3900 . ?
C2 C29 1.522(9) . ?
C3 C4 1.3900 . ?
C3 C30 1.505(8) . ?
C4 C5 1.3900 . ?
C4 C31 1.537(8) . ?
C5 C6 1.3900 . ?
C5 C32 1.506(8) . ?
C6 C33 1.529(8) . ?
C7 O1 1.361(6) . ?
C7 C8 1.3900 . ?
C7 C12 1.3900 . ?
C8 C9 1.3900 . ?
C9 C10 1.3900 . ?
C10 C11 1.3900 . ?
C10 C26 1.437(10) . ?
C11 C12 1.3900 . ?
C13 O3 1.345(6) . ?
C13 C14 1.3900 . ?
C13 C18 1.3900 . ?
C14 C15 1.3900 . ?
C15 C16 1.3900 . ?
C16 C17 1.3900 . ?
C16 C27 1.428(11) . ?
C17 C18 1.3900 . ?
C19 O2 1.351(5) . ?
C19 C20 1.3900 . ?
C19 C24 1.3900 . ?
C20 C21 1.3900 . ?
C21 C22 1.3900 . ?
C22 C23 1.3900 . ?
C22 C25 1.436(9) . ?
C23 C24 1.3900 . ?
C25 N1 1.131(9) . ?
C26 N2 1.144(10) . ?
C27 N3 1.149(10) . ?
C28 O2 1.453(7) . ?
C30 O1 1.453(8) . ?
C32 O3 1.431(8) . ?

loop_
 _geom_angle_atom_site_label_1
 _geom_angle_atom_site_label_2
 _geom_angle_atom_site_label_3
 _geom_angle
 _geom_angle_site_symmetry_1
 _geom_angle_site_symmetry_3
 _geom_angle_publ_flag
C2 C1 C6 120.0 . . ?
C2 C1 C28 121.0(5) . . ?
C6 C1 C28 119.0(5) . . ?
C3 C2 C1 120.0 . . ?
C3 C2 C29 120.8(5) . . ?
C1 C2 C29 119.2(5) . . ?
C2 C3 C4 120.0 . . ?
C2 C3 C30 119.7(5) . . ?
C4 C3 C30 120.1(5) . . ?
C5 C4 C3 120.0 . . ?
C5 C4 C31 121.1(5) . . ?
C3 C4 C31 118.9(5) . . ?
C4 C5 C6 120.0 . . ?
C4 C5 C32 119.9(5) . . ?
C6 C5 C32 120.1(5) . . ?
C5 C6 C1 120.0 . . ?
C5 C6 C33 119.2(5) . . ?
C1 C6 C33 120.7(5) . . ?
O1 C7 C8 125.0(4) . . ?
O1 C7 C12 114.9(4) . . ?
C8 C7 C12 120.0 . . ?
C9 C8 C7 120.0 . . ?
C8 C9 C10 120.0 . . ?
C11 C10 C9 120.0 . . ?
C11 C10 C26 119.0(5) . . ?
C9 C10 C26 121.0(5) . . ?
C10 C11 C12 120.0 . . ?
C11 C12 C7 120.0 . . ?
O3 C13 C14 124.9(4) . . ?
O3 C13 C18 115.1(4) . . ?
C14 C13 C18 120.0 . . ?
C15 C14 C13 120.0 . . ?
C14 C15 C16 120.0 . . ?
C17 C16 C15 120.0 . . ?
C17 C16 C27 117.8(5) . . ?
C15 C16 C27 122.2(5) . . ?
C16 C17 C18 120.0 . . ?
C17 C18 C13 120.0 . . ?
O2 C19 C20 124.9(4) . . ?
O2 C19 C24 115.1(4) . . ?
C20 C19 C24 120.0 . . ?
C19 C20 C21 120.0 . . ?
C20 C21 C22 120.0 . . ?
C23 C22 C21 120.0 . . ?
C23 C22 C25 119.3(4) . . ?
C21 C22 C25 120.6(4) . . ?
C24 C23 C22 120.0 . . ?
C23 C24 C19 120.0 . . ?
N1 C25 C22 179.6(10) . . ?
N2 C26 C10 177.4(10) . . ?
N3 C27 C16 177.7(10) . . ?
O2 C28 C1 105.7(5) . . ?
O1 C30 C3 105.2(5) . . ?
O3 C32 C5 105.7(5) . . ?
C7 O1 C30 118.5(5) . . ?
C19 O2 C28 118.9(5) . . ?
C13 O3 C32 119.3(5) . . ?

_diffrn_measured_fraction_theta_max    0.992
_diffrn_reflns_theta_full              21.98
_diffrn_measured_fraction_theta_full   0.992
_refine_diff_density_max    0.403
_refine_diff_density_min   -0.381
_refine_diff_density_rms    0.070

#===END
data_1b

_diffrn_measurement_domega        0.30
_diffrn_measurement_rtime         30

_chemical_formula_sum
 'C34 H30 N3 O3.50'
_chemical_formula_weight          536.61

loop_
 _atom_type_symbol
 _atom_type_description
 _atom_type_scat_dispersion_real
 _atom_type_scat_dispersion_imag
 _atom_type_scat_source
 'C'  'C'   0.0033   0.0016
 'International Tables Vol C Tables 4.2.6.8 and 6.1.1.4'
 'H'  'H'   0.0000   0.0000
 'International Tables Vol C Tables 4.2.6.8 and 6.1.1.4'
 'N'  'N'   0.0061   0.0033
 'International Tables Vol C Tables 4.2.6.8 and 6.1.1.4'
 'O'  'O'   0.0106   0.0060
 'International Tables Vol C Tables 4.2.6.8 and 6.1.1.4'

_symmetry_cell_setting           'Monoclinic'
_symmetry_space_group_name_H-M   'C2/c (15)'

loop_
 _symmetry_equiv_pos_as_xyz
 'x, y, z'
 '-x, y, -z+1/2'
 'x+1/2, y+1/2, z'
 '-x+1/2, y+1/2, -z+1/2'
 '-x, -y, -z'
 'x, -y, z-1/2'
 '-x+1/2, -y+1/2, -z'
 'x+1/2, -y+1/2, z-1/2'

_cell_length_a                    30.7623(19)
_cell_length_b                    8.6307(5)
_cell_length_c                    25.0032(15)
_cell_angle_alpha                 90.00
_cell_angle_beta                  118.669(2)
_cell_angle_gamma                 90.00
_cell_volume                      5824.5(6)
_cell_formula_units_Z             8
_cell_measurement_temperature     200
_cell_measurement_reflns_used     3304
_cell_measurement_theta_min       3
_cell_measurement_theta_max       20

_exptl_crystal_description        column
_exptl_crystal_colour             colourless
_exptl_crystal_size_max           0.20
_exptl_crystal_size_mid           0.06
_exptl_crystal_size_min           0.04
_exptl_crystal_density_diffrn     1.224
_exptl_crystal_density_method     'not measured'
_exptl_crystal_F_000              2264
_exptl_absorpt_coefficient_mu     0.080
_exptl_absorpt_correction_type    sadabs
_exptl_absorpt_correction_T_min   0.92
_exptl_absorpt_correction_T_max   1.00

_diffrn_ambient_temperature       200
_diffrn_radiation_wavelength      0.71073
_diffrn_radiation_type            MoK\a
_diffrn_radiation_source          'fine-focus sealed tube'
_diffrn_radiation_monochromator   graphite
_diffrn_measurement_device        SMART
_diffrn_detector_type             CCD_plate
_diffrn_measurement_method        omega-scan
_diffrn_standards_decay_%         0
_diffrn_reflns_number             22324
_diffrn_reflns_av_R_equivalents   0.0415
_diffrn_reflns_av_sigmaI/netI     0.0374
_diffrn_reflns_limit_h_min        -36
_diffrn_reflns_limit_h_max        36
_diffrn_reflns_limit_k_min        -10
_diffrn_reflns_limit_k_max        10
_diffrn_reflns_limit_l_min        -29
_diffrn_reflns_limit_l_max        29
_diffrn_reflns_theta_min          1.51
_diffrn_reflns_theta_max          25.06
_reflns_number_total              5154
_reflns_number_observed           3295
_reflns_observed_criterion        >2sigma(I)

_computing_structure_solution     SIR92
_computing_structure_refinement   'SHELXL-97 (Sheldrick, 1997)'
_computing_molecular_graphics     SCHAKAL

_refine_special_details
;
 Refinement of F^2^ against ALL reflections.  The weighted R-factor wR and
 goodness of fit S are based on F^2^, conventional R-factors R are based
 on F, with F set to zero for negative F^2^. The threshold expression of
 F^2^ > 2sigma(F^2^) is used only for calculating R-factors(gt) etc. and is
 not relevant to the choice of reflections for refinement.  R-factors based
 on F^2^ are statistically about twice as large as those based on F, and R-
 factors based on ALL data will be even larger.
;

_refine_ls_structure_factor_coef  Fsqd
_refine_ls_matrix_type            full
_refine_ls_weighting_scheme       calc
_refine_ls_weighting_details
 'calc w=1/[\s^2^(Fo^2^)+(0.1118P)^2^+0.2769P] where P=(Fo^2^+2Fc^2^)/3'
_atom_sites_solution_primary      direct
_atom_sites_solution_secondary    difmap
_atom_sites_solution_hydrogens    geom
_refine_ls_hydrogen_treatment     mixed
_refine_ls_extinction_method      none
_refine_ls_number_reflns          5154
_refine_ls_number_parameters      370
_refine_ls_number_restraints      3
_refine_ls_R_factor_all           0.0911
_refine_ls_R_factor_obs           0.0600
_refine_ls_wR_factor_all          0.1986
_refine_ls_wR_factor_obs          0.1747
_refine_ls_goodness_of_fit_all    1.093
_refine_ls_restrained_S_all       1.124
_refine_ls_shift/su_max           0.005
_refine_ls_shift/su_mean          0.001

loop_
 _atom_site_label
 _atom_site_type_symbol
 _atom_site_fract_x
 _atom_site_fract_y
 _atom_site_fract_z
 _atom_site_U_iso_or_equiv
 _atom_site_adp_type
 _atom_site_occupancy
 _atom_site_symmetry_multiplicity
 _atom_site_calc_flag
 _atom_site_refinement_flags
 _atom_site_disorder_assembly
 _atom_site_disorder_group
O1 O 0.34042(6) 0.01386(19) 0.14940(8) 0.0589(5) Uani 1 1 d . . .
O2 O 0.26352(7) -0.09835(19) -0.12093(8) 0.0597(5) Uani 1 1 d . . .
O3 O 0.12348(6) -0.0552(2) 0.00648(9) 0.0664(5) Uani 1 1 d . . .
C4 C 0.27841(9) 0.0724(3) 0.04936(11) 0.0472(6) Uani 1 1 d . . .
C5 C 0.28168(8) -0.0192(3) 0.00565(11) 0.0475(6) Uani 1 1 d . . .
C6 C 0.23818(9) -0.0749(3) -0.04421(11) 0.0480(6) Uani 1 1 d . . .
C7 C 0.38298(9) 0.0390(3) 0.20236(12) 0.0528(6) Uani 1 1 d . . .
C8 C 0.18917(9) 0.0524(3) -0.00476(12) 0.0496(6) Uani 1 1 d . . .
C9 C 0.28213(10) -0.1857(3) -0.15060(12) 0.0568(7) Uani 1 1 d . . .
C10 C 0.24198(10) -0.1812(3) -0.08912(12) 0.0577(7) Uani 1 1 d . . .
H10A H 0.2625 -0.2698 -0.0680 0.069 Uiso 1 1 calc R . .
H10B H 0.2093 -0.2188 -0.1181 0.069 Uiso 1 1 calc R . .
C11 C 0.23221(9) 0.1056(3) 0.04556(11) 0.0485(6) Uani 1 1 d . . .
C12 C 0.32442(9) 0.1319(3) 0.10256(11) 0.0561(7) Uani 1 1 d . . .
H12A H 0.3499 0.1507 0.0910 0.067 Uiso 1 1 calc R . .
H12B H 0.3177 0.2282 0.1172 0.067 Uiso 1 1 calc R . .
C13 C 0.41157(10) 0.1725(3) 0.21539(13) 0.0604(7) Uani 1 1 d . . .
H13 H 0.4022 0.2524 0.1871 0.073 Uiso 1 1 calc R . .
C14 C 0.19189(9) -0.0371(3) -0.05010(11) 0.0502(6) Uani 1 1 d . . .
C15 C 0.39689(10) -0.0797(3) 0.24509(13) 0.0629(7) Uani 1 1 d . . .
H15 H 0.3774 -0.1680 0.2367 0.075 Uiso 1 1 calc R . .
C16 C 0.13895(9) 0.0845(3) -0.01114(14) 0.0609(7) Uani 1 1 d . . .
H16A H 0.1407 0.1698 0.0150 0.073 Uiso 1 1 calc R . .
H16B H 0.1157 0.1113 -0.0529 0.073 Uiso 1 1 calc R . .
C17 C 0.46865(10) 0.0665(4) 0.31301(13) 0.0654(8) Uani 1 1 d . . .
C18 C 0.07407(10) -0.0864(3) -0.01700(14) 0.0634(7) Uani 1 1 d . . .
C19 C 0.43936(11) -0.0657(3) 0.29944(14) 0.0694(8) Uani 1 1 d . . .
H19 H 0.4488 -0.1456 0.3278 0.083 Uiso 1 1 calc R . .
C20 C 0.33140(9) -0.0611(3) 0.01140(13) 0.0614(7) Uani 1 1 d . . .
H20A H 0.3283 -0.1542 -0.0112 0.074 Uiso 1 1 calc R . .
H20B H 0.3549 -0.0774 0.0536 0.074 Uiso 1 1 calc R . .
H20C H 0.3427 0.0217 -0.0045 0.074 Uiso 1 1 calc R . .
C21 C 0.22970(11) 0.1945(3) 0.09621(14) 0.0657(8) Uani 1 1 d . . .
H21A H 0.2591 0.1747 0.1341 0.079 Uiso 1 1 calc R . .
H21B H 0.2011 0.1618 0.0993 0.079 Uiso 1 1 calc R . .
H21C H 0.2273 0.3034 0.0874 0.079 Uiso 1 1 calc R . .
C22 C 0.26820(12) -0.3383(3) -0.16834(14) 0.0707(8) Uani 1 1 d . . .
H22 H 0.2438 -0.3845 -0.1619 0.085 Uiso 1 1 calc R . .
C23 C 0.31719(11) -0.1166(3) -0.16228(13) 0.0669(8) Uani 1 1 d . . .
H23 H 0.3255 -0.0133 -0.1520 0.080 Uiso 1 1 calc R . .
C24 C 0.32694(13) -0.3535(3) -0.20540(14) 0.0750(9) Uani 1 1 d . . .
C25 C 0.33975(13) -0.1991(3) -0.18890(15) 0.0761(9) Uani 1 1 d . . .
H25 H 0.3637 -0.1520 -0.1960 0.091 Uiso 1 1 calc R . .
C26 C 0.45412(10) 0.1849(4) 0.27097(13) 0.0663(8) Uani 1 1 d . . .
H26 H 0.4732 0.2744 0.2801 0.080 Uiso 1 1 calc R . .
C27 C -0.01325(12) -0.0347(5) -0.07700(16) 0.0844(10) Uani 1 1 d . . .
H27 H -0.0387 0.0310 -0.1028 0.101 Uiso 1 1 calc R . .
C28 C 0.14480(10) -0.0930(4) -0.10435(13) 0.0708(8) Uani 1 1 d . . .
H28A H 0.1178 -0.0854 -0.0954 0.085 Uiso 1 1 calc R . .
H28B H 0.1488 -0.1990 -0.1129 0.085 Uiso 1 1 calc R . .
H28C H 0.1379 -0.0301 -0.1392 0.085 Uiso 1 1 calc R . .
C29 C 0.03614(10) 0.0116(4) -0.05473(14) 0.0715(8) Uani 1 1 d . . .
H29 H 0.0434 0.1078 -0.0653 0.086 Uiso 1 1 calc R . .
C30 C 0.51361(13) 0.0824(4) 0.37004(17) 0.0818(10) Uani 1 1 d . . .
C31 C 0.35300(16) -0.4435(4) -0.22950(17) 0.0942(11) Uani 1 1 d . . .
C32 C 0.06278(14) -0.2268(4) -0.0013(2) 0.0989(12) Uani 1 1 d . . .
H32 H 0.0879 -0.2936 0.0244 0.119 Uiso 1 1 calc R . .
N1 N 0.54917(12) 0.0993(4) 0.41484(15) 0.1093(11) Uani 1 1 d . . .
C34 C 0.29063(14) -0.4207(4) -0.19554(15) 0.0819(10) Uani 1 1 d . . .
H34 H 0.2812 -0.5228 -0.2074 0.098 Uiso 1 1 calc R . .
C35 C -0.02437(13) -0.1720(5) -0.06176(19) 0.0905(11) Uani 1 1 d . . .
C36 C -0.07496(15) -0.2180(5) -0.0851(2) 0.1153(15) Uani 1 1 d . . .
N2 N 0.37477(16) -0.5151(4) -0.24680(18) 0.1255(14) Uani 1 1 d . . .
C38 C 0.01338(17) -0.2683(4) -0.0242(2) 0.1158(15) Uani 1 1 d . . .
H38 H 0.0058 -0.3641 -0.0138 0.139 Uiso 1 1 calc R . .
N3 N -0.11511(14) -0.2568(5) -0.1033(2) 0.1537(18) Uani 1 1 d . . .
C2S C 0.01859(15) 0.8458(6) 0.78358(16) 0.1523(17) Uani 0.75 1 d PD . .
C1S C 0.04035(19) 1.0063(6) 0.7866(3) 0.0937(17) Uani 0.25 1 d PD . .
O2S O 0.01859(15) 0.8458(6) 0.78358(16) 0.1523(17) Uani 0.25 1 d P . .
O1S O 0.04035(19) 1.0063(6) 0.7866(3) 0.0937(17) Uani 0.25 1 d P . .

loop_
 _atom_site_aniso_label
 _atom_site_aniso_U_11
 _atom_site_aniso_U_22
 _atom_site_aniso_U_33
 _atom_site_aniso_U_23
 _atom_site_aniso_U_13
 _atom_site_aniso_U_12
O1 0.0582(11) 0.0531(10) 0.0549(11) 0.0078(8) 0.0185(9) -0.0128(8)
O2 0.0813(12) 0.0447(10) 0.0726(12) 0.0011(8) 0.0527(11) -0.0073(8)
O3 0.0584(11) 0.0594(11) 0.0930(14) 0.0203(10) 0.0455(11) 0.0048(9)
C4 0.0498(14) 0.0395(12) 0.0505(15) 0.0080(11) 0.0225(12) -0.0045(10)
C5 0.0472(14) 0.0401(13) 0.0574(16) 0.0084(11) 0.0269(13) -0.0014(10)
C6 0.0528(15) 0.0416(13) 0.0542(15) 0.0067(11) 0.0294(13) -0.0042(10)
C7 0.0505(15) 0.0541(15) 0.0526(16) -0.0005(12) 0.0237(14) -0.0061(12)
C8 0.0495(14) 0.0419(13) 0.0605(16) 0.0113(12) 0.0289(13) 0.0021(11)
C9 0.0763(18) 0.0451(14) 0.0574(17) -0.0009(12) 0.0389(15) -0.0061(12)
C10 0.0687(16) 0.0513(14) 0.0628(17) -0.0006(13) 0.0394(14) -0.0136(12)
C11 0.0578(15) 0.0362(12) 0.0566(16) 0.0066(11) 0.0315(13) -0.0019(11)
C12 0.0602(15) 0.0480(14) 0.0565(16) 0.0088(12) 0.0252(13) -0.0086(12)
C13 0.0577(16) 0.0626(17) 0.0577(17) 0.0033(13) 0.0250(14) -0.0124(13)
C14 0.0475(14) 0.0460(13) 0.0551(16) 0.0103(12) 0.0230(12) -0.0046(11)
C15 0.0693(18) 0.0533(16) 0.0618(18) 0.0026(14) 0.0281(16) -0.0057(13)
C16 0.0577(16) 0.0503(15) 0.0800(19) 0.0137(13) 0.0372(15) 0.0028(12)
C17 0.0582(17) 0.0716(19) 0.0571(18) -0.0055(15) 0.0200(15) 0.0042(14)
C18 0.0654(18) 0.0586(17) 0.084(2) -0.0050(15) 0.0504(16) -0.0026(14)
C19 0.076(2) 0.0649(18) 0.0591(18) 0.0059(15) 0.0258(16) 0.0104(15)
C20 0.0520(15) 0.0609(16) 0.0733(18) 0.0088(14) 0.0316(14) 0.0015(12)
C21 0.0819(19) 0.0483(15) 0.077(2) 0.0018(14) 0.0465(17) 0.0005(13)
C22 0.097(2) 0.0536(16) 0.080(2) -0.0104(14) 0.0576(19) -0.0204(15)
C23 0.097(2) 0.0445(14) 0.083(2) -0.0049(14) 0.0617(18) -0.0152(14)
C24 0.116(2) 0.0585(17) 0.076(2) -0.0058(15) 0.068(2) -0.0057(17)
C25 0.103(2) 0.0635(18) 0.092(2) -0.0067(16) 0.071(2) -0.0143(16)
C26 0.0587(17) 0.0725(19) 0.066(2) -0.0098(15) 0.0290(16) -0.0166(14)
C27 0.0650(19) 0.116(3) 0.081(2) -0.017(2) 0.0423(18) -0.0149(19)
C28 0.0582(17) 0.088(2) 0.0592(18) 0.0017(16) 0.0224(14) -0.0125(15)
C29 0.0599(18) 0.079(2) 0.080(2) 0.0032(16) 0.0375(16) -0.0038(15)
C30 0.067(2) 0.079(2) 0.079(2) -0.0079(18) 0.018(2) 0.0086(16)
C31 0.155(3) 0.067(2) 0.105(3) -0.0074(19) 0.098(3) -0.003(2)
C32 0.094(2) 0.0607(19) 0.178(4) 0.016(2) 0.094(3) 0.0020(17)
N1 0.085(2) 0.097(2) 0.092(2) -0.0149(18) -0.0006(19) 0.0112(17)
C34 0.131(3) 0.0533(17) 0.087(2) -0.0154(16) 0.073(2) -0.0201(18)
C35 0.082(2) 0.095(3) 0.123(3) -0.050(2) 0.072(2) -0.031(2)
C36 0.097(3) 0.132(3) 0.158(4) -0.077(3) 0.094(3) -0.053(2)
N2 0.214(4) 0.084(2) 0.149(3) -0.011(2) 0.143(3) 0.007(2)
C38 0.119(3) 0.064(2) 0.215(5) -0.016(3) 0.121(3) -0.019(2)
N3 0.109(3) 0.181(4) 0.215(4) -0.107(3) 0.113(3) -0.070(3)
C2S 0.119(3) 0.188(5) 0.142(4) -0.025(3) 0.056(3) -0.034(3)
C1S 0.074(3) 0.071(3) 0.122(5) 0.013(3) 0.036(3) -0.005(3)
O2S 0.119(3) 0.188(5) 0.142(4) -0.025(3) 0.056(3) -0.034(3)
O1S 0.074(3) 0.071(3) 0.122(5) 0.013(3) 0.036(3) -0.005(3)

_geom_special_details
;
 All esds (except the esd in the dihedral angle between two l.s. planes)
 are estimated using the full covariance matrix.  The cell esds are taken
 into account individually in the estimation of esds in distances, angles
 and torsion angles; correlations between esds in cell parameters are only
 used when they are defined by crystal symmetry.  An approximate (isotropic)
 treatment of cell esds is used for estimating esds involving l.s. planes.
;

loop_
 _geom_bond_atom_site_label_1
 _geom_bond_atom_site_label_2
 _geom_bond_distance
 _geom_bond_site_symmetry_2
 _geom_bond_publ_flag
O1 C7 1.360(3) . ?
O1 C12 1.449(3) . ?
O2 C9 1.362(3) . ?
O2 C10 1.445(3) . ?
O3 C18 1.368(3) . ?
O3 C16 1.440(3) . ?
C4 C5 1.391(3) . ?
C4 C11 1.407(3) . ?
C4 C12 1.493(3) . ?
C5 C6 1.406(3) . ?
C5 C20 1.510(3) . ?
C6 C14 1.398(3) . ?
C6 C10 1.497(3) . ?
C7 C13 1.390(3) . ?
C7 C15 1.391(4) . ?
C8 C11 1.396(3) . ?
C8 C14 1.407(4) . ?
C8 C16 1.501(3) . ?
C9 C23 1.380(4) . ?
C9 C22 1.390(4) . ?
C11 C21 1.514(4) . ?
C13 C26 1.382(4) . ?
C14 C28 1.512(4) . ?
C15 C19 1.365(4) . ?
C17 C26 1.377(4) . ?
C17 C19 1.391(4) . ?
C17 C30 1.440(4) . ?
C18 C32 1.369(4) . ?
C18 C29 1.382(4) . ?
C22 C34 1.377(4) . ?
C23 C25 1.369(4) . ?
C24 C34 1.382(4) . ?
C24 C25 1.394(4) . ?
C24 C31 1.440(4) . ?
C27 C35 1.338(5) . ?
C27 C29 1.402(4) . ?
C30 N1 1.139(4) . ?
C31 N2 1.138(4) . ?
C32 C38 1.389(5) . ?
C35 C38 1.369(6) . ?
C35 C36 1.431(5) . ?
C36 N3 1.142(4) . ?
C2S C2S 1.512(7) 2_556 ?
C2S O2S 1.512(7) 2_556 ?
C2S C1S 1.524(6) . ?

loop_
 _geom_angle_atom_site_label_1
 _geom_angle_atom_site_label_2
 _geom_angle_atom_site_label_3
 _geom_angle
 _geom_angle_site_symmetry_1
 _geom_angle_site_symmetry_3
 _geom_angle_publ_flag
C7 O1 C12 118.03(18) . . ?
C9 O2 C10 116.69(18) . . ?
C18 O3 C16 119.7(2) . . ?
C5 C4 C11 120.9(2) . . ?
C5 C4 C12 120.0(2) . . ?
C11 C4 C12 119.0(2) . . ?
C4 C5 C6 119.6(2) . . ?
C4 C5 C20 120.9(2) . . ?
C6 C5 C20 119.5(2) . . ?
C14 C6 C5 120.1(2) . . ?
C14 C6 C10 120.4(2) . . ?
C5 C6 C10 119.4(2) . . ?
O1 C7 C13 124.4(2) . . ?
O1 C7 C15 115.4(2) . . ?
C13 C7 C15 120.2(2) . . ?
C11 C8 C14 120.6(2) . . ?
C11 C8 C16 121.2(2) . . ?
C14 C8 C16 118.2(2) . . ?
O2 C9 C23 116.8(2) . . ?
O2 C9 C22 123.5(2) . . ?
C23 C9 C22 119.6(2) . . ?
O2 C10 C6 109.31(19) . . ?
C8 C11 C4 119.0(2) . . ?
C8 C11 C21 120.9(2) . . ?
C4 C11 C21 120.1(2) . . ?
O1 C12 C4 106.71(18) . . ?
C26 C13 C7 119.2(3) . . ?
C6 C14 C8 119.7(2) . . ?
C6 C14 C28 120.6(2) . . ?
C8 C14 C28 119.7(2) . . ?
C19 C15 C7 119.6(3) . . ?
O3 C16 C8 106.70(19) . . ?
C26 C17 C19 119.1(3) . . ?
C26 C17 C30 119.4(3) . . ?
C19 C17 C30 121.5(3) . . ?
O3 C18 C32 115.7(3) . . ?
O3 C18 C29 125.0(2) . . ?
C32 C18 C29 119.3(3) . . ?
C15 C19 C17 120.9(3) . . ?
C34 C22 C9 119.8(3) . . ?
C25 C23 C9 120.5(2) . . ?
C34 C24 C25 119.1(3) . . ?
C34 C24 C31 120.5(3) . . ?
C25 C24 C31 120.3(3) . . ?
C23 C25 C24 120.2(3) . . ?
C17 C26 C13 120.9(3) . . ?
C35 C27 C29 121.0(4) . . ?
C18 C29 C27 119.7(3) . . ?
N1 C30 C17 178.1(4) . . ?
N2 C31 C24 177.9(5) . . ?
C18 C32 C38 119.2(4) . . ?
C22 C34 C24 120.7(3) . . ?
C27 C35 C38 119.0(3) . . ?
C27 C35 C36 120.4(4) . . ?
C38 C35 C36 120.7(4) . . ?
N3 C36 C35 178.9(7) . . ?
C35 C38 C32 121.7(3) . . ?
C2S C2S O2S 0.0(3) 2_556 2_556 ?
C2S C2S C1S 97.8(3) 2_556 . ?
O2S C2S C1S 97.8(3) 2_556 . ?

_diffrn_measured_fraction_theta_max    0.998
_diffrn_reflns_theta_full              25.06
_diffrn_measured_fraction_theta_full   0.998
_refine_diff_density_max    0.405
_refine_diff_density_min   -0.295
_refine_diff_density_rms    0.048

#===END
data_2

_diffrn_measurement_domega        0.30
_diffrn_measurement_rtime         30

_chemical_formula_sum
 'C34 H28 Ag F3 N3 O6.50 S'
_chemical_formula_weight          779.52

loop_
 _atom_type_symbol
 _atom_type_description
 _atom_type_scat_dispersion_real
 _atom_type_scat_dispersion_imag
 _atom_type_scat_source
 'C'  'C'   0.0033   0.0016
 'International Tables Vol C Tables 4.2.6.8 and 6.1.1.4'
 'H'  'H'   0.0000   0.0000
 'International Tables Vol C Tables 4.2.6.8 and 6.1.1.4'
 'N'  'N'   0.0061   0.0033
 'International Tables Vol C Tables 4.2.6.8 and 6.1.1.4'
 'O'  'O'   0.0106   0.0060
 'International Tables Vol C Tables 4.2.6.8 and 6.1.1.4'
 'Ag'  'Ag'  -0.8971   1.1015
 'International Tables Vol C Tables 4.2.6.8 and 6.1.1.4'
 'S'  'S'   0.1246   0.1234
 'International Tables Vol C Tables 4.2.6.8 and 6.1.1.4'
 'F'  'F'   0.0171   0.0103
 'International Tables Vol C Tables 4.2.6.8 and 6.1.1.4'

_symmetry_cell_setting            Monoclinic
_symmetry_space_group_name_H-M    'P21/c (14)'

loop_
 _symmetry_equiv_pos_as_xyz
 'x, y, z'
 '-x, y+1/2, -z+1/2'
 '-x, -y, -z'
 'x, -y-1/2, z-1/2'

_cell_length_a                    8.739(3)
_cell_length_b                    17.023(6)
_cell_length_c                    23.119(8)
_cell_angle_alpha                 90.00
_cell_angle_beta                  94.077(9)
_cell_angle_gamma                 90.00
_cell_volume                      3431(2)
_cell_formula_units_Z             4
_cell_measurement_temperature     293(2)
_cell_measurement_reflns_used     770
_cell_measurement_theta_min       3
_cell_measurement_theta_max       20

_exptl_crystal_description        column
_exptl_crystal_colour             colourless
_exptl_crystal_size_max           0.30
_exptl_crystal_size_mid           0.20
_exptl_crystal_size_min           0.12
_exptl_crystal_density_diffrn     1.509
_exptl_crystal_density_method     'not measured'
_exptl_crystal_F_000              1580
_exptl_absorpt_coefficient_mu     0.714
_exptl_absorpt_correction_type    sadabs
_exptl_absorpt_correction_T_min   0.44
_exptl_absorpt_correction_T_max   1.00

_diffrn_ambient_temperature       293(2)
_diffrn_radiation_wavelength      0.71073
_diffrn_radiation_type            MoK\a
_diffrn_radiation_source          'fine-focus sealed tube'
_diffrn_radiation_monochromator   graphite
_diffrn_measurement_device        SMART
_diffrn_detector_type             CCD_plate
_diffrn_measurement_method        omega-scan
_diffrn_standards_decay_%         0
_diffrn_reflns_number             28498
_diffrn_reflns_av_R_equivalents   0.1263
_diffrn_reflns_av_sigmaI/netI     0.1076
_diffrn_reflns_limit_h_min        -10
_diffrn_reflns_limit_h_max        10
_diffrn_reflns_limit_k_min        -20
_diffrn_reflns_limit_k_max        20
_diffrn_reflns_limit_l_min        -27
_diffrn_reflns_limit_l_max        27
_diffrn_reflns_theta_min          1.49
_diffrn_reflns_theta_max          25.10
_reflns_number_total              6080
_reflns_number_observed           2710
_reflns_observed_criterion        >2sigma(I)

_computing_structure_solution     SIR92
_computing_structure_refinement   'SHELXL-97 (Sheldrick, 1997)'
_computing_molecular_graphics     SCHAKAL

_refine_special_details
;
 Refinement of F^2^ against ALL reflections.  The weighted R-factor wR and
 goodness of fit S are based on F^2^, conventional R-factors R are based
 on F, with F set to zero for negative F^2^. The threshold expression of
 F^2^ > 2sigma(F^2^) is used only for calculating R-factors(gt) etc. and is
 not relevant to the choice of reflections for refinement.  R-factors based
 on F^2^ are statistically about twice as large as those based on F, and R-
 factors based on ALL data will be even larger.
;

_refine_ls_structure_factor_coef  Fsqd
_refine_ls_matrix_type            full
_refine_ls_weighting_scheme       calc
_refine_ls_weighting_details
 'calc w=1/[\s^2^(Fo^2^)+(0.0966P)^2^+0.0000P] where P=(Fo^2^+2Fc^2^)/3'
_atom_sites_solution_primary      direct
_atom_sites_solution_secondary    difmap
_atom_sites_solution_hydrogens    geom
_refine_ls_hydrogen_treatment     mixed
_refine_ls_extinction_method      SHELXL
_refine_ls_extinction_coef        0.0061(7)
_refine_ls_extinction_expression
 'Fc^*^=kFc[1+0.001xFc^2^\l^3^/sin(2\q)]^-1/4^'
_refine_ls_number_reflns          6080
_refine_ls_number_parameters      440
_refine_ls_number_restraints      0
_refine_ls_R_factor_all           0.1532
_refine_ls_R_factor_obs           0.0592
_refine_ls_wR_factor_all          0.1960
_refine_ls_wR_factor_obs          0.1417
_refine_ls_goodness_of_fit_all    0.967
_refine_ls_restrained_S_all       0.967
_refine_ls_shift/su_max           0.005
_refine_ls_shift/su_mean          0.000

loop_
 _atom_site_label
 _atom_site_type_symbol
 _atom_site_fract_x
 _atom_site_fract_y
 _atom_site_fract_z
 _atom_site_U_iso_or_equiv
 _atom_site_adp_type
 _atom_site_occupancy
 _atom_site_symmetry_multiplicity
 _atom_site_calc_flag
 _atom_site_refinement_flags
 _atom_site_disorder_assembly
 _atom_site_disorder_group
Ag Ag 1.35632(7) -0.62978(4) -0.05866(2) 0.0882(3) Uani 1 1 d . . .
O3 O 0.6920(5) 0.1302(3) 0.09555(19) 0.0724(13) Uani 1 1 d . . .
O4 O 0.8396(5) -0.1769(3) -0.0517(2) 0.0741(13) Uani 1 1 d . . .
C6 C 0.6629(7) 0.0665(3) 0.0038(2) 0.0541(15) Uani 1 1 d . . .
C8 C 0.7383(6) -0.0049(4) 0.0131(3) 0.0573(16) Uani 1 1 d . . .
O9 O 0.6038(5) 0.0742(3) -0.18599(18) 0.0770(13) Uani 1 1 d . . .
C11 C 0.8175(6) -0.0392(4) -0.0310(3) 0.0593(17) Uani 1 1 d . . .
C15 C 0.7346(9) 0.1466(4) 0.2504(3) 0.081(2) Uani 1 1 d . . .
H15 H 0.8138 0.1508 0.2793 0.098 Uiso 1 1 calc R . .
N1 N 0.4606(9) 0.1484(4) -0.4676(3) 0.111(2) Uani 1 1 d . . .
C18 C 0.7413(7) 0.0697(4) -0.0944(3) 0.0591(16) Uani 1 1 d . . .
C20 C 0.5955(8) 0.1856(4) -0.0595(3) 0.088(2) Uani 1 1 d . . .
H20A H 0.6723 0.2232 -0.0684 0.132 Uiso 1 1 calc R . .
H20B H 0.5490 0.2017 -0.0250 0.132 Uiso 1 1 calc R . .
H20C H 0.5185 0.1828 -0.0912 0.132 Uiso 1 1 calc R . .
C21 C 0.5235(9) 0.1218(4) -0.3594(3) 0.077(2) Uani 1 1 d . . .
C22 C 0.6687(7) 0.1060(4) -0.0499(3) 0.0614(17) Uani 1 1 d . . .
C23 C 0.5851(8) 0.0935(4) -0.2431(3) 0.0664(18) Uani 1 1 d . . .
C26 C 0.6490(8) 0.1363(4) 0.1502(3) 0.0665(18) Uani 1 1 d . . .
C27 C 0.9203(7) -0.2450(4) -0.0507(3) 0.0662(18) Uani 1 1 d . . .
C28 C 0.4975(8) 0.1346(4) 0.1652(3) 0.0722(19) Uani 1 1 d . . .
H28 H 0.4177 0.1307 0.1365 0.087 Uiso 1 1 calc R . .
C32 C 1.0672(9) -0.3892(4) -0.0539(4) 0.080(2) Uani 1 1 d . . .
C33 C 0.9104(8) -0.1127(4) -0.0194(4) 0.081(2) Uani 1 1 d . . .
H33A H 1.0139 -0.1048 -0.0308 0.098 Uiso 1 1 calc R . .
H33B H 0.9160 -0.1246 0.0217 0.098 Uiso 1 1 calc R . .
C35 C 0.7668(8) 0.1432(4) 0.1940(3) 0.074(2) Uani 1 1 d . . .
H35 H 0.8682 0.1456 0.1844 0.089 Uiso 1 1 calc R . .
C36 C 0.5771(8) 0.1013(4) 0.0512(3) 0.0725(19) Uani 1 1 d . . .
H36A H 0.5126 0.1442 0.0363 0.087 Uiso 1 1 calc R . .
H36B H 0.5125 0.0619 0.0675 0.087 Uiso 1 1 calc R . .
C37 C 0.6786(9) 0.1419(4) -0.2722(3) 0.077(2) Uani 1 1 d . . .
H37 H 0.7635 0.1652 -0.2527 0.093 Uiso 1 1 calc R . .
C38 C 0.8165(7) -0.0025(4) -0.0854(3) 0.0603(16) Uani 1 1 d . . .
C39 C 0.4266(9) 0.0724(4) -0.3298(3) 0.081(2) Uani 1 1 d . . .
H39 H 0.3417 0.0492 -0.3495 0.098 Uiso 1 1 calc R . .
C40 C 0.8915(9) -0.2957(4) -0.0969(3) 0.088(2) Uani 1 1 d . . .
H40 H 0.8223 -0.2811 -0.1275 0.106 Uiso 1 1 calc R . .
C41 C 1.0987(9) -0.3386(5) -0.0081(3) 0.090(2) Uani 1 1 d . . .
H41 H 1.1702 -0.3526 0.0218 0.108 Uiso 1 1 calc R . .
C42 C 0.5853(9) 0.1437(4) 0.2651(3) 0.0712(19) Uani 1 1 d . . .
C43 C 0.7378(8) 0.1064(4) -0.1536(3) 0.079(2) Uani 1 1 d . . .
H43A H 0.7298 0.1631 -0.1508 0.095 Uiso 1 1 calc R . .
H43B H 0.8303 0.0935 -0.1724 0.095 Uiso 1 1 calc R . .
C44 C 0.9636(9) -0.3670(5) -0.0984(4) 0.095(3) Uani 1 1 d . . .
H44 H 0.9424 -0.4006 -0.1297 0.114 Uiso 1 1 calc R . .
C45 C 0.6463(10) 0.1559(4) -0.3309(3) 0.082(2) Uani 1 1 d . . .
H45 H 0.7095 0.1889 -0.3507 0.098 Uiso 1 1 calc R . .
C46 C 0.4894(9) 0.1356(5) -0.4205(3) 0.086(2) Uani 1 1 d . . .
C49 C 1.0249(9) -0.2676(4) -0.0064(3) 0.087(2) Uani 1 1 d . . .
H49 H 1.0459 -0.2343 0.0250 0.104 Uiso 1 1 calc R . .
C50 C 0.7327(8) -0.0477(4) 0.0710(3) 0.078(2) Uani 1 1 d . . .
H50A H 0.7044 -0.1015 0.0641 0.117 Uiso 1 1 calc R . .
H50B H 0.6584 -0.0229 0.0936 0.117 Uiso 1 1 calc R . .
H50C H 0.8319 -0.0455 0.0917 0.117 Uiso 1 1 calc R . .
N2 N 0.5263(9) 0.1361(4) 0.3730(3) 0.104(2) Uani 1 1 d . . .
C52 C 0.4580(8) 0.0587(4) -0.2720(3) 0.075(2) Uani 1 1 d . . .
H52 H 0.3945 0.0260 -0.2521 0.091 Uiso 1 1 calc R . .
C55 C 0.8950(8) -0.0419(5) -0.1342(3) 0.098(3) Uani 1 1 d . . .
H55A H 0.9608 -0.0830 -0.1186 0.147 Uiso 1 1 calc R . .
H55B H 0.9548 -0.0038 -0.1533 0.147 Uiso 1 1 calc R . .
H55C H 0.8189 -0.0638 -0.1616 0.147 Uiso 1 1 calc R . .
N3 N 1.2104(9) -0.5219(5) -0.0567(3) 0.117(2) Uani 1 1 d . . .
C57 C 1.1459(10) -0.4628(5) -0.0563(4) 0.099(3) Uani 1 1 d . . .
C65 C 0.5518(9) 0.1412(4) 0.3258(4) 0.086(2) Uani 1 1 d . . .
C69 C 0.4662(8) 0.1387(4) 0.2226(3) 0.077(2) Uani 1 1 d . . .
H69 H 0.3652 0.1382 0.2328 0.092 Uiso 1 1 calc R . .
S S 0.8919(2) -0.27484(13) 0.15180(9) 0.0867(6) Uani 1 1 d . . .
O11 O 0.7865(6) -0.2590(3) 0.1016(2) 0.0982(17) Uani 1 1 d . . .
F13 F 0.8563(8) -0.1326(3) 0.1897(2) 0.134(2) Uani 1 1 d . . .
O12 O 1.0463(6) -0.2560(4) 0.1450(3) 0.121(2) Uani 1 1 d . . .
F12 F 0.6928(8) -0.2136(4) 0.2146(3) 0.155(2) Uani 1 1 d . . .
F11 F 0.9201(8) -0.2149(4) 0.2543(2) 0.164(2) Uani 1 1 d . . .
O13 O 0.8659(8) -0.3495(3) 0.1788(3) 0.128(2) Uani 1 1 d . . .
C100 C 0.8373(12) -0.2068(6) 0.2041(4) 0.098(3) Uani 1 1 d . . .
O1W O -0.007(2) 0.5016(13) 0.2034(9) 0.222(8) Uiso 0.50 1 d P . .

loop_
 _atom_site_aniso_label
 _atom_site_aniso_U_11
 _atom_site_aniso_U_22
 _atom_site_aniso_U_33
 _atom_site_aniso_U_23
 _atom_site_aniso_U_13
 _atom_site_aniso_U_12
Ag 0.1154(6) 0.0886(5) 0.0578(4) -0.0136(3) -0.0125(3) 0.0176(3)
O3 0.064(3) 0.102(3) 0.050(3) -0.027(2) -0.005(2) -0.010(2)
O4 0.070(3) 0.061(3) 0.087(3) -0.017(2) -0.025(3) 0.007(2)
C6 0.056(4) 0.063(4) 0.040(3) -0.010(3) -0.018(3) 0.004(3)
C8 0.048(4) 0.067(4) 0.054(4) -0.003(3) -0.021(3) -0.006(3)
O9 0.090(3) 0.096(3) 0.042(2) 0.012(2) -0.018(2) -0.028(3)
C11 0.047(4) 0.061(4) 0.067(4) -0.014(4) -0.020(3) 0.000(3)
C15 0.082(6) 0.098(6) 0.063(5) -0.028(4) -0.013(4) -0.004(4)
N1 0.126(6) 0.141(6) 0.064(5) 0.019(4) -0.011(4) -0.009(5)
C18 0.059(4) 0.078(5) 0.038(3) -0.001(3) -0.013(3) -0.016(4)
C20 0.097(5) 0.069(5) 0.094(6) 0.005(4) -0.027(5) 0.019(4)
C21 0.102(6) 0.082(5) 0.044(4) -0.004(4) -0.013(4) 0.002(4)
C22 0.057(4) 0.066(4) 0.056(4) -0.007(3) -0.026(3) -0.004(3)
C23 0.086(5) 0.063(4) 0.047(4) 0.004(3) -0.018(4) -0.002(4)
C26 0.063(4) 0.075(4) 0.060(4) -0.025(4) -0.004(4) -0.008(3)
C27 0.063(4) 0.064(4) 0.070(5) -0.015(4) -0.006(4) -0.001(4)
C28 0.058(4) 0.093(5) 0.063(4) -0.023(4) -0.006(3) -0.004(4)
C32 0.082(5) 0.071(5) 0.087(6) -0.012(4) 0.013(5) 0.004(4)
C33 0.075(5) 0.068(5) 0.096(6) -0.024(4) -0.033(4) 0.010(4)
C35 0.062(4) 0.099(5) 0.059(4) -0.026(4) -0.008(4) -0.008(4)
C36 0.062(4) 0.089(5) 0.063(4) -0.021(4) -0.020(4) 0.010(4)
C37 0.090(5) 0.086(5) 0.053(4) 0.007(4) -0.013(4) -0.020(4)
C38 0.053(4) 0.070(4) 0.056(4) -0.015(3) -0.013(3) -0.007(3)
C39 0.102(6) 0.086(5) 0.051(4) 0.001(4) -0.030(4) -0.002(4)
C40 0.096(5) 0.085(5) 0.079(5) -0.022(4) -0.027(4) 0.012(5)
C41 0.102(6) 0.083(5) 0.080(5) -0.014(4) -0.021(5) 0.024(5)
C42 0.075(5) 0.080(5) 0.059(5) -0.020(3) 0.003(4) -0.002(4)
C43 0.084(5) 0.095(5) 0.054(4) 0.001(4) -0.016(4) -0.028(4)
C44 0.104(6) 0.087(6) 0.090(6) -0.041(5) -0.021(5) 0.015(5)
C45 0.111(6) 0.086(5) 0.047(4) 0.007(4) -0.004(4) 0.001(4)
C46 0.099(6) 0.107(6) 0.050(4) 0.002(4) -0.012(4) 0.010(5)
C49 0.106(6) 0.074(5) 0.075(5) -0.019(4) -0.035(4) 0.022(4)
C50 0.089(5) 0.084(5) 0.056(4) 0.017(4) -0.030(4) -0.011(4)
N2 0.125(6) 0.119(6) 0.067(5) -0.019(4) 0.004(4) -0.018(4)
C52 0.085(5) 0.080(5) 0.059(4) 0.004(4) -0.012(4) -0.016(4)
C55 0.077(5) 0.121(7) 0.098(6) -0.041(5) 0.022(5) -0.013(5)
N3 0.131(6) 0.094(5) 0.123(6) -0.015(5) -0.007(5) 0.025(5)
C57 0.104(6) 0.085(6) 0.108(7) -0.016(5) -0.002(5) 0.016(5)
C65 0.092(6) 0.086(6) 0.077(6) -0.027(5) -0.004(5) -0.009(4)
C69 0.070(5) 0.094(5) 0.066(5) -0.025(4) 0.003(4) 0.001(4)
S 0.0822(14) 0.0911(15) 0.0823(14) -0.0038(11) -0.0268(11) 0.0033(11)
O11 0.101(4) 0.099(4) 0.087(4) -0.003(3) -0.043(3) 0.009(3)
F13 0.203(6) 0.082(4) 0.115(4) -0.001(3) 0.000(4) -0.013(3)
O12 0.073(4) 0.175(6) 0.111(5) -0.009(4) -0.011(3) -0.004(4)
F12 0.149(5) 0.149(5) 0.173(6) -0.028(4) 0.058(5) -0.007(4)
F11 0.238(7) 0.183(6) 0.063(3) -0.015(3) -0.049(4) 0.010(5)
O13 0.150(5) 0.077(4) 0.150(6) 0.012(4) -0.037(5) 0.007(3)
C100 0.108(7) 0.106(7) 0.078(6) 0.009(5) -0.011(5) -0.001(6)

_geom_special_details
;
 All esds (except the esd in the dihedral angle between two l.s. planes)
 are estimated using the full covariance matrix.  The cell esds are taken
 into account individually in the estimation of esds in distances, angles
 and torsion angles; correlations between esds in cell parameters are only
 used when they are defined by crystal symmetry.  An approximate (isotropic)
 treatment of cell esds is used for estimating esds involving l.s. planes.
;

loop_
 _geom_bond_atom_site_label_1
 _geom_bond_atom_site_label_2
 _geom_bond_distance
 _geom_bond_site_symmetry_2
 _geom_bond_publ_flag
Ag N3 2.238(8) . ?
Ag N2 2.246(8) 4_655 ?
Ag N1 2.256(8) 4_656 ?
Ag O11 2.440(5) 3_745 ?
O3 C26 1.347(8) . ?
O3 C36 1.469(7) . ?
O4 C27 1.356(7) . ?
O4 C33 1.439(7) . ?
C6 C8 1.393(8) . ?
C6 C22 1.415(8) . ?
C6 C36 1.493(8) . ?
C8 C11 1.400(8) . ?
C8 C50 1.528(8) . ?
O9 C23 1.360(7) . ?
O9 C43 1.452(7) . ?
C11 C38 1.404(9) . ?
C11 C33 1.505(9) . ?
C15 C35 1.355(9) . ?
C15 C42 1.372(10) . ?
N1 C46 1.123(9) . ?
N1 Ag 2.256(8) 4_455 ?
C18 C22 1.391(9) . ?
C18 C38 1.402(9) . ?
C18 C43 1.503(9) . ?
C20 C22 1.508(9) . ?
C21 C45 1.350(10) . ?
C21 C39 1.405(10) . ?
C21 C46 1.441(10) . ?
C23 C37 1.370(9) . ?
C23 C52 1.388(9) . ?
C26 C28 1.393(9) . ?
C26 C35 1.397(9) . ?
C27 C49 1.377(9) . ?
C27 C40 1.384(9) . ?
C28 C69 1.376(10) . ?
C32 C44 1.375(11) . ?
C32 C41 1.377(10) . ?
C32 C57 1.433(11) . ?
C37 C45 1.386(9) . ?
C38 C55 1.517(9) . ?
C39 C52 1.365(9) . ?
C40 C44 1.369(9) . ?
C41 C49 1.371(10) . ?
C42 C69 1.382(10) . ?
C42 C65 1.453(11) . ?
N2 C65 1.134(9) . ?
N2 Ag 2.246(8) 4_456 ?
N3 C57 1.154(9) . ?
S O12 1.407(6) . ?
S O13 1.442(6) . ?
S O11 1.454(5) . ?
S C100 1.763(10) . ?
O11 Ag 2.440(5) 3_745 ?
F13 C100 1.321(9) . ?
F12 C100 1.308(10) . ?
F11 C100 1.331(9) . ?

loop_
 _geom_angle_atom_site_label_1
 _geom_angle_atom_site_label_2
 _geom_angle_atom_site_label_3
 _geom_angle
 _geom_angle_site_symmetry_1
 _geom_angle_site_symmetry_3
 _geom_angle_publ_flag
N3 Ag N2 117.4(3) . 4_655 ?
N3 Ag N1 106.8(3) . 4_656 ?
N2 Ag N1 114.0(3) 4_655 4_656 ?
N3 Ag O11 111.7(2) . 3_745 ?
N2 Ag O11 91.2(2) 4_655 3_745 ?
N1 Ag O11 115.6(2) 4_656 3_745 ?
C26 O3 C36 117.3(5) . . ?
C27 O4 C33 115.9(5) . . ?
C8 C6 C22 120.3(6) . . ?
C8 C6 C36 119.3(6) . . ?
C22 C6 C36 120.4(6) . . ?
C6 C8 C11 120.2(6) . . ?
C6 C8 C50 120.5(6) . . ?
C11 C8 C50 119.3(6) . . ?
C23 O9 C43 116.6(5) . . ?
C8 C11 C38 119.8(6) . . ?
C8 C11 C33 120.3(6) . . ?
C38 C11 C33 119.9(6) . . ?
C35 C15 C42 120.2(7) . . ?
C46 N1 Ag 157.9(7) . 4_455 ?
C22 C18 C38 121.0(6) . . ?
C22 C18 C43 120.5(6) . . ?
C38 C18 C43 118.5(6) . . ?
C45 C21 C39 120.3(6) . . ?
C45 C21 C46 120.7(8) . . ?
C39 C21 C46 119.0(7) . . ?
C18 C22 C6 118.9(6) . . ?
C18 C22 C20 120.1(6) . . ?
C6 C22 C20 121.0(6) . . ?
O9 C23 C37 126.0(6) . . ?
O9 C23 C52 113.7(6) . . ?
C37 C23 C52 120.3(6) . . ?
O3 C26 C28 124.4(6) . . ?
O3 C26 C35 116.5(6) . . ?
C28 C26 C35 119.1(6) . . ?
O4 C27 C49 124.7(6) . . ?
O4 C27 C40 117.0(6) . . ?
C49 C27 C40 118.2(7) . . ?
C69 C28 C26 119.7(6) . . ?
C44 C32 C41 119.3(7) . . ?
C44 C32 C57 120.3(7) . . ?
C41 C32 C57 120.4(8) . . ?
O4 C33 C11 109.4(5) . . ?
C15 C35 C26 120.5(7) . . ?
O3 C36 C6 106.9(5) . . ?
C23 C37 C45 119.8(7) . . ?
C18 C38 C11 119.6(6) . . ?
C18 C38 C55 120.7(6) . . ?
C11 C38 C55 119.7(6) . . ?
C52 C39 C21 119.6(7) . . ?
C44 C40 C27 121.0(7) . . ?
C49 C41 C32 120.3(7) . . ?
C15 C42 C69 120.5(7) . . ?
C15 C42 C65 120.0(7) . . ?
C69 C42 C65 119.4(7) . . ?
O9 C43 C18 106.0(5) . . ?
C40 C44 C32 120.3(7) . . ?
C21 C45 C37 120.2(7) . . ?
N1 C46 C21 177.8(9) . . ?
C41 C49 C27 121.0(7) . . ?
C65 N2 Ag 150.0(8) . 4_456 ?
C39 C52 C23 119.8(7) . . ?
C57 N3 Ag 174.4(8) . . ?
N3 C57 C32 178.3(10) . . ?
N2 C65 C42 177.2(9) . . ?
C28 C69 C42 119.9(7) . . ?
O12 S O13 115.5(4) . . ?
O12 S O11 115.3(4) . . ?
O13 S O11 113.5(4) . . ?
O12 S C100 103.6(4) . . ?
O13 S C100 102.9(4) . . ?
O11 S C100 103.8(4) . . ?
S O11 Ag 117.2(3) . 3_745 ?
F12 C100 F13 105.7(8) . . ?
F12 C100 F11 107.6(8) . . ?
F13 C100 F11 104.3(8) . . ?
F12 C100 S 112.4(7) . . ?
F13 C100 S 114.3(7) . . ?
F11 C100 S 112.0(7) . . ?

_diffrn_measured_fraction_theta_max    0.995
_diffrn_reflns_theta_full              25.10
_diffrn_measured_fraction_theta_full   0.995
_refine_diff_density_max    0.531
_refine_diff_density_min   -0.685
_refine_diff_density_rms    0.094

#===END
